# Supplementary material for: Two common structural motifs for TCR recognition by staphylococcal enterotoxins
Source: PubMed Central journal article supplement (PMC4867771; doi:10.1038/srep25796), 2016-05-16
Supplement: srep25796-s1.pdf [file srep25796-s1.pdf]

## Supplementary Information

Two common structural motifs for TCR recognition by staphylococcal enterotoxins

**Karin Erica Johanna Rödström<sup>1</sup>, Paulina Regenthal<sup>1</sup>, Christopher Bahl<sup>2</sup>, Alex Ford<sup>2</sup>, David Baker<sup>2</sup>, Karin Lindkvist-Petersson<sup>1</sup>**

1. Department of Experimental Medical Science, Lund University, BMC C13, 22 184, Lund, Sweden.
2. Department of Biochemistry, University of Washington, and Howard Hughes Medical Institute, Seattle, Washington 98195, USA.

## Supplementary Figures

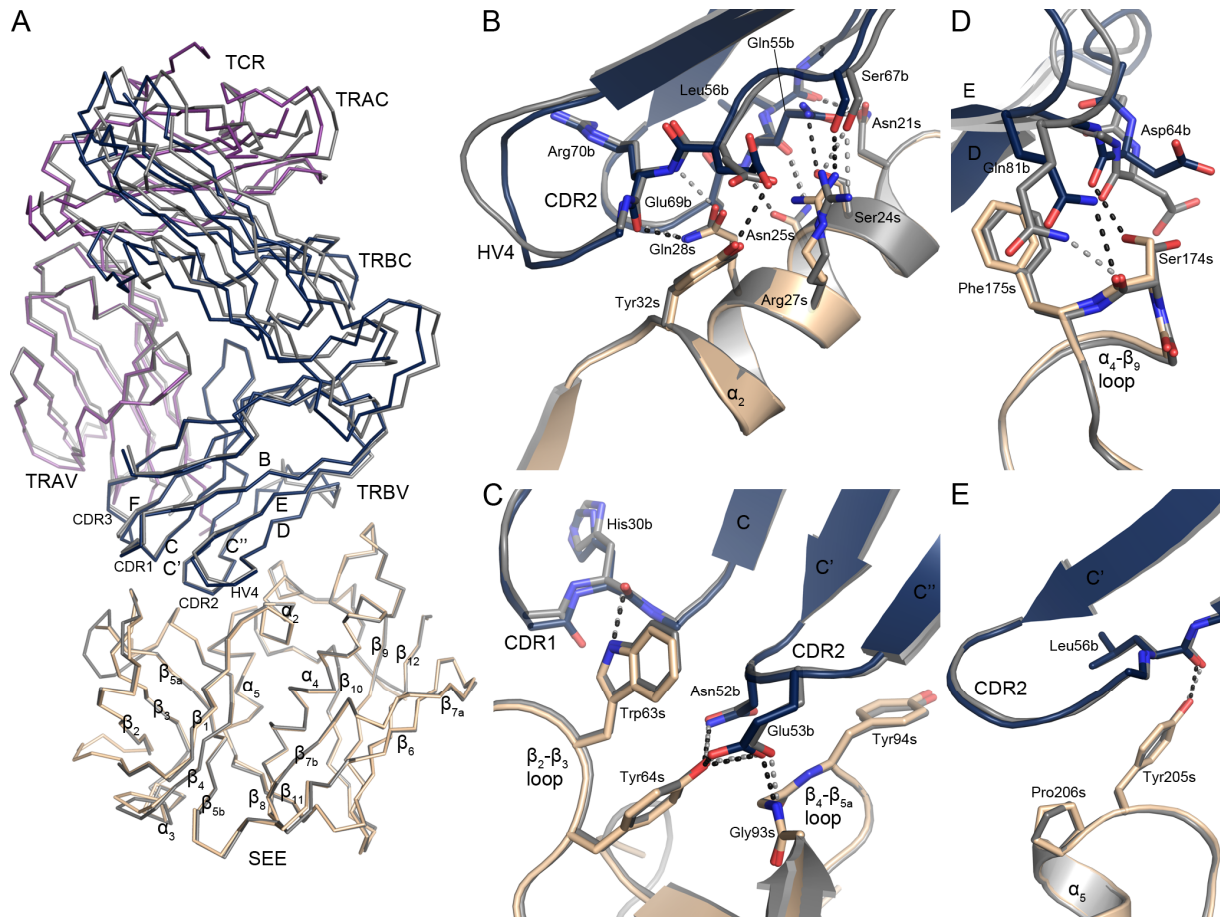

**Figure S1. Structure of the SEE-TCR Complex.** The present structure (PDB ID: 5FKA) (coloured) compared to the previously published SEE-TCR structure (PDB ID: 4UDU) (grey) (A) Overall structure of SEE-TCR, with SEE shown in beige, and TCR in purple and blue for the  $\alpha$ - and  $\beta$ -chain, respectively. Close-up of the SEE  $\alpha_2$ -helix (B) and contacting residues in TCR, the hydrophobic patch, consisting of the  $\beta_2$ - $\beta_3$  and  $\beta_4$ - $\beta_{5a}$  loops (C), the  $\alpha_4$ - $\beta_9$  loop (D), (E) and the upper part of the  $\alpha_5$ -helix. Hydrogen bonds are marked as dotted lines and residues designated as “s” for SAg and “b” for TRBV7-9.

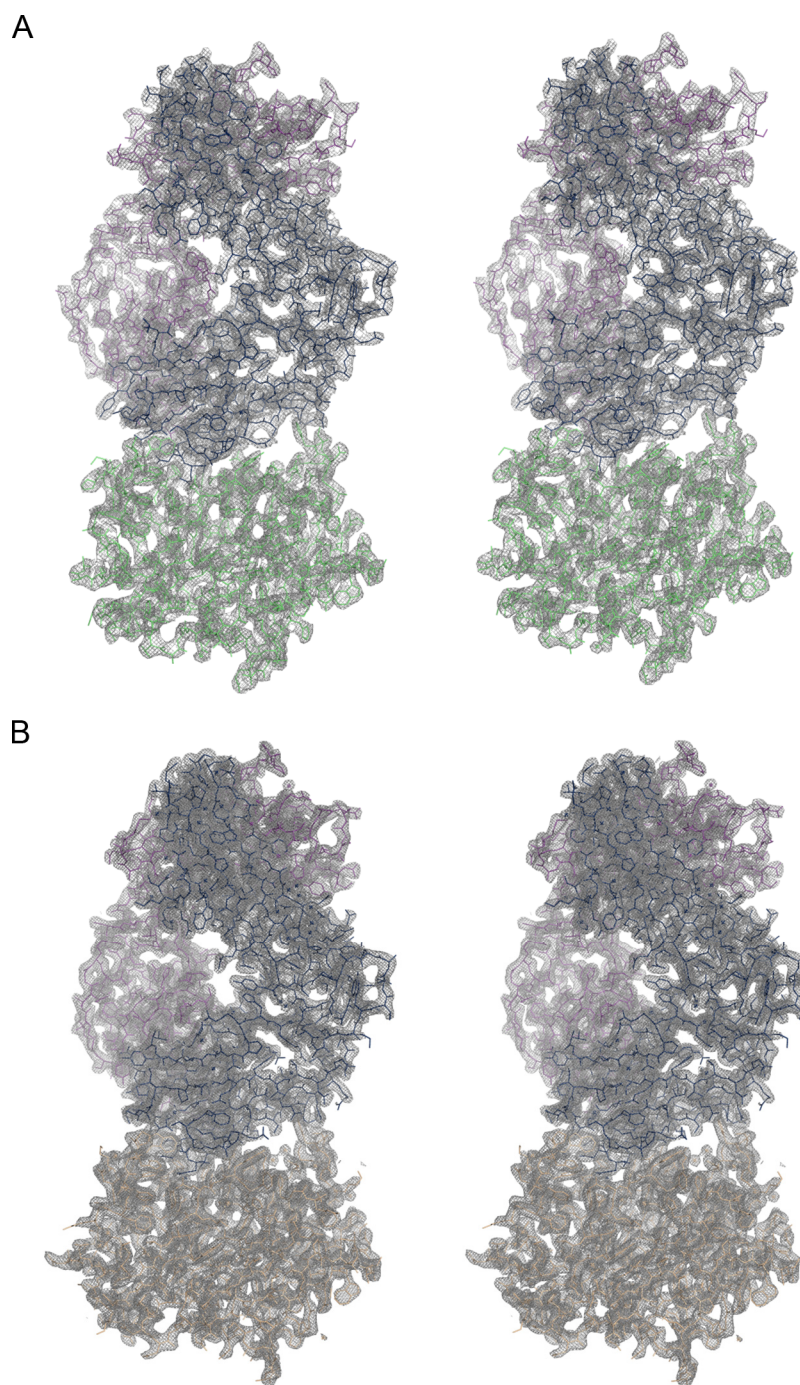

**Figure S2. Stereo view of the  $2F_o-F_c$  electron density maps of the structures. (A) SEA<sup>F47A</sup>-TCR with SEA in green, TCR $\alpha$  in purple and TCR $\beta$  in blue. (B) SEE-TCR, with SEE in beige, TCR $\alpha$  in purple and TCR $\beta$  in blue. Structures are shown in stick representation, with the  $2F_o-F_c$  maps contoured at  $1.0\sigma$ .**

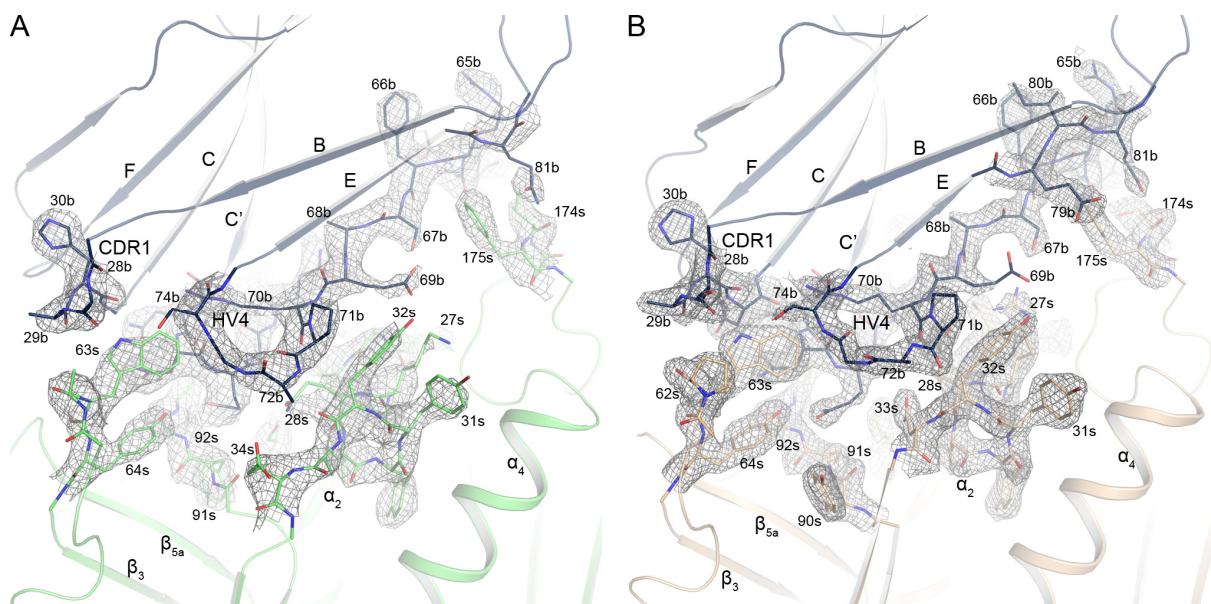

**Figure S3. View of the SAg-TCR interfaces.** The  $2F_o-F_c$  electron density maps contoured at  $1.0\sigma$  are shown around interface residues in the (A) SEA<sup>F47A</sup>-TCR and (B) SEE-TCR structures. Residues designated as “s” for SAg and “b” for TRBV7-9.

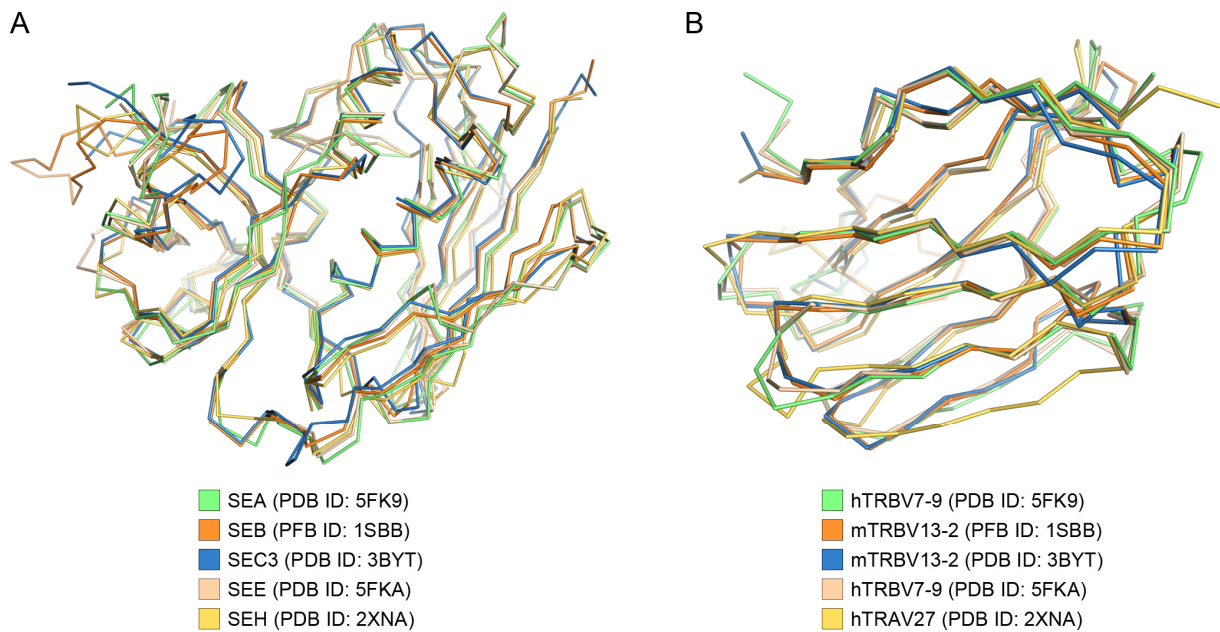

**Figure S4. Alignment of the SAgS and TRBV/TRAVs investigated.** (A) Superantigens SEB, SEC3, SEE, and SEH are aligned with respect to SEA (B) The hTRBV7-9, mTRBV 13-3 and hTRAV27 aligned with respect to hTRBV7-9 in the SEA<sup>F47A</sup>-TCR structure. Alignments were performed using secondary structure matching and RMSD values are shown in Supplementary Table S3.

## Supplementary Tables

**Table S1. Intermolecular Hydrogen Bonds in the SEE-TCR Structure.**

| Residue<br>SEE | Atom | Residue<br>TRBV | Atom | Distance<br>[Å] |
|----------------|------|-----------------|------|-----------------|
| Asn21          | Oδ1  | Gln55           | Oε1  | 3.0             |
| Asn21          | Nδ2  | Leu56           | O    | 3.2             |
| Ser24          | Oγ   | Gln55           | Nε2  | 2.9             |
| <u>Asn25</u>   | Oδ1  | Gln55           | N    | 2.8             |
| <u>Asn25</u>   | Nδ2  | Gln55           | O    | 3.1             |
| Arg27          | Nη2  | Ser67           | Oγ   | 3.1             |
| Gln28          | Nε2  | Arg70           | O    | 3.0             |
| Tyr32          | Oη   | Glu69           | Oε2  | 2.9             |
| Trp63          | Nε1  | His30           | O    | 3.1             |
| Tyr64          | Oη   | Asn52           | Nδ2  | 2.9             |
| Tyr64          | Oη   | Glu53           | Oε1  | 3.0             |
| Tyr64          | Oη   | Glu53           | Oε2  | 2.9             |
| Gly93          | N    | Glu53           | Oε1  | 3.0             |
| Ser174         | O    | Gln81           | Nε2  | 3.1             |
| Ser174         | Oγ   | Asp64           | O    | 2.7             |
| Tyr205         | Oη   | Leu56           | O    | 2.6             |

**Table S2. Intermolecular Van der Waals Contacts (distances less than 4 Å) in the SEA<sup>F47A</sup>-TCR and SEE-TCR Complexes.**

| SEA          | TCR   | SEE          | TCR   |
|--------------|-------|--------------|-------|
| Thr21        | Ser28 | Arg20        | Ser28 |
| <u>Asn25</u> | Glu29 | Asn21        | Glu29 |
| Lys27        | His30 | Ser24        | His30 |
| Gln28        | Gln51 | <u>Asn25</u> | Asn31 |
| Tyr32        | Asn52 | Arg27        | Gln51 |
| Glu34        | Glu53 | Gln28        | Asn52 |
| Ser62        | Ala54 | Tyr32        | Glu53 |
| Trp63        | Gln55 | Asn33        | Ala54 |
| Tyr64        | Leu56 | Pro62        | Gln55 |
| Tyr92        | Asp64 | Trp63        | Leu56 |
| Gly93        | Arg65 | Tyr64        | Glu57 |
| <u>Tyr94</u> | Ser67 | Tyr91        | Lys58 |
| Val174       | Glu69 | Tyr92        | Asp64 |
| Phe175       | Arg70 | Gly93        | Arg65 |
| Tyr205       | Pro71 | <u>Tyr94</u> | Phe66 |
| Ser206       | Lys72 | Ser174       | Ser67 |
|              | Gly73 | Phe175       | Ala68 |
|              | Ser74 | Tyr205       | Glu69 |
|              | Gln81 | Pro206       | Arg70 |
|              |       |              | Pro71 |
|              |       |              | Ser74 |
|              |       |              | Glu79 |
|              |       |              | Gln81 |

**Table S3. Pairwise RMSD values (Å) between SAg (chain IDs B or C) and variable TCR domains (chain IDs A or B), calculated using secondary structure matching.**

| SAg                   | SEA<br>5FK9 (C)      | SEB<br>1SBB (B)       | SEC3<br>3BYT (B)      | SEE<br>5FKA (C)      | SEH<br>2XNA (C)     |
|-----------------------|----------------------|-----------------------|-----------------------|----------------------|---------------------|
| SEA<br>5FK9 (C)       | 0                    | 1.68                  | 1.63                  | 0.789                | 1.31                |
| SEB<br>1SBB (B)       |                      | 0                     | 0.732                 | 1.59                 | 1.69                |
| SEC3<br>3BYT (B)      |                      |                       | 0                     | 1.60                 | 1.66                |
| SEE<br>5FKA (C)       |                      |                       |                       | 0                    | 1.43                |
| SEH<br>2XNA (C)       |                      |                       |                       |                      | 0                   |
| TRBV/TRAV             | hTRBV7-9<br>5FK9 (B) | mTRBV13-2<br>1SBB (A) | mTRBV13-2<br>3BYT (A) | hTRBV7-9<br>5FKA (B) | hTRAV27<br>2XNA (B) |
| hTRBV7-9<br>5FK9 (B)  | 0                    | 1.41                  | 1.46                  | 0.700                | 1.43                |
| mTRBV13-2<br>1SBB (A) |                      | 0                     | 0.590                 | 1.36                 | 1.40                |
| mTRBV13-2<br>3BYT (A) |                      |                       | 0                     | 1.44                 | 1.46                |
| hTRBV7-9<br>5FKA (B)  |                      |                       |                       | 0                    | 1.31                |
| hTRAV27<br>2XNA (B)   |                      |                       |                       |                      | 0                   |

**Table S4. Equilibrium Dissociation Constants for the Studied Staphylococcal Enterotoxins to TCR.**

| SAg  | TCR       | K <sub>d</sub> [μM] | Reference                            |
|------|-----------|---------------------|--------------------------------------|
| SEA  | hTRBV7-9  | 0.7                 | Hedlund et al. (2013) <sup>1</sup>   |
| SEE  | hTRBV7-9  | 6                   | Hedlund et al. (2013) <sup>1</sup>   |
| SEB  | mTRBV13-2 | 140                 | Malchiodi et al. (1995) <sup>2</sup> |
| SEB  | hTRBV19   | 40-90               | Rodstrom et al. (2014) <sup>3</sup>  |
| SEC3 | mTRBV13-2 | 3                   | Leder et al. (1998) <sup>4</sup>     |
| SEH  | hTRAV27   | 4                   | Pumphrey et al. (2007) <sup>5</sup>  |

**Table S5. Residues in TCR Affected by *in Silico* Alanine-scanning Mutagenesis with  $\Delta\Delta G_{\text{complex}}$  values shown in kcal/mol.**

| <b>SEA-hTRBV7-9</b>  |                                                     | <b>SEE-hTRBV7-9</b>   |                                                     |
|----------------------|-----------------------------------------------------|-----------------------|-----------------------------------------------------|
| <b>Residue</b>       | <b><math>\Delta\Delta G_{\text{complex}}</math></b> | <b>Residue</b>        | <b><math>\Delta\Delta G_{\text{complex}}</math></b> |
| Glu53                | 3.31                                                | Asn52                 | 1.07                                                |
| Gln55                | 1.52                                                | Glu53                 | 1.83                                                |
| Leu56                | 1.18                                                | Leu56                 | 1.12                                                |
| Gln81                | 1.02                                                | Glu57                 | 1.30                                                |
|                      |                                                     | Gln81                 | 1.45                                                |
| <b>SEB-mTRBV13-2</b> |                                                     | <b>SEC3-mTRBV13-2</b> |                                                     |
| <b>Residue</b>       | <b><math>\Delta\Delta G_{\text{complex}}</math></b> | <b>Residue</b>        | <b><math>\Delta\Delta G_{\text{complex}}</math></b> |
| -                    | -                                                   | Lys57                 | 1.39                                                |
| <b>SEB-hTRBV19</b>   |                                                     | <b>SEH-hTRAV27</b>    |                                                     |
| <b>Residue</b>       | <b><math>\Delta\Delta G_{\text{complex}}</math></b> | <b>Residue</b>        | <b><math>\Delta\Delta G_{\text{complex}}</math></b> |
| Tyr49                | 1.11                                                | Val28                 | 1.07                                                |
| Gln52                | 0.96                                                | Arg69                 | 4.62                                                |
| Ile53                | 1.23                                                |                       |                                                     |
| Phe57                | 1.84                                                |                       |                                                     |

## Supplementary References

- 1 Hedlund, G. *et al.* The tumor targeted superantigen ABR-217620 selectively engages TRBV7-9 and exploits TCR-pMHC affinity mimicry in mediating T cell cytotoxicity. *PLoS one* **8**, e79082, doi:10.1371/journal.pone.0079082 (2013).
- 2 Malchiodi, E. L. *et al.* Superantigen binding to a T cell receptor beta chain of known three-dimensional structure. *The Journal of experimental medicine* **182**, 1833-1845 (1995).
- 3 Rodstrom, K. E., Elbing, K. & Lindkvist-Petersson, K. Structure of the superantigen staphylococcal enterotoxin B in complex with TCR and peptide-MHC demonstrates absence of TCR-peptide contacts. *J Immunol* **193**, 1998-2004, doi:10.4049/jimmunol.1401268 (2014).
- 4 Leder, L. *et al.* A mutational analysis of the binding of staphylococcal enterotoxins B and C3 to the T cell receptor beta chain and major histocompatibility complex class II. *The Journal of experimental medicine* **187**, 823-833 (1998).
- 5 Pumphrey, N. *et al.* Cutting edge: Evidence of direct TCR alpha-chain interaction with superantigen. *J Immunol* **179**, 2700-2704, doi:10.1093/immdev/179/5/2700 [pii] (2007).
